# Supplementary material
Source: PubMed Central journal article supplement (PMC10560395)
Supplement: NIHMS1923124-supplement-41593_2020_608_MOESM1_ESM.pdf [file NIHMS1923124-supplement-41593_2020_608_MOESM1_ESM.pdf]

In the format provided by the authors and unedited.

# Machine translation of cortical activity to text with an encoder-decoder framework

Joseph G. Makin 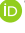<sup>1,2</sup> 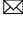, David A. Moses<sup>1,2</sup> and Edward F. Chang 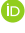<sup>1,2</sup> 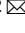

---

<sup>1</sup>Center for Integrative Neuroscience, UCSF, San Francisco, CA, USA. <sup>2</sup>Department of Neurological Surgery, UCSF, San Francisco, CA, USA.

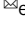e-mail: [makin@phy.ucsf.edu](mailto:makin@phy.ucsf.edu); [edward.chang@ucsf.edu](mailto:edward.chang@ucsf.edu)

# Machine translation of cortical activity to text with an encoder-decoder framework – Supplementary Information

Joseph G. Makin<sup>1,2</sup>, David A. Moses<sup>1,2</sup>, and Edward F. Chang<sup>1,2</sup>

<sup>1</sup>Center for Integrative Neuroscience, UCSF, San Francisco, California, USA

<sup>2</sup>Department of Neurological Surgery, UCSF, San Francisco, California, USA

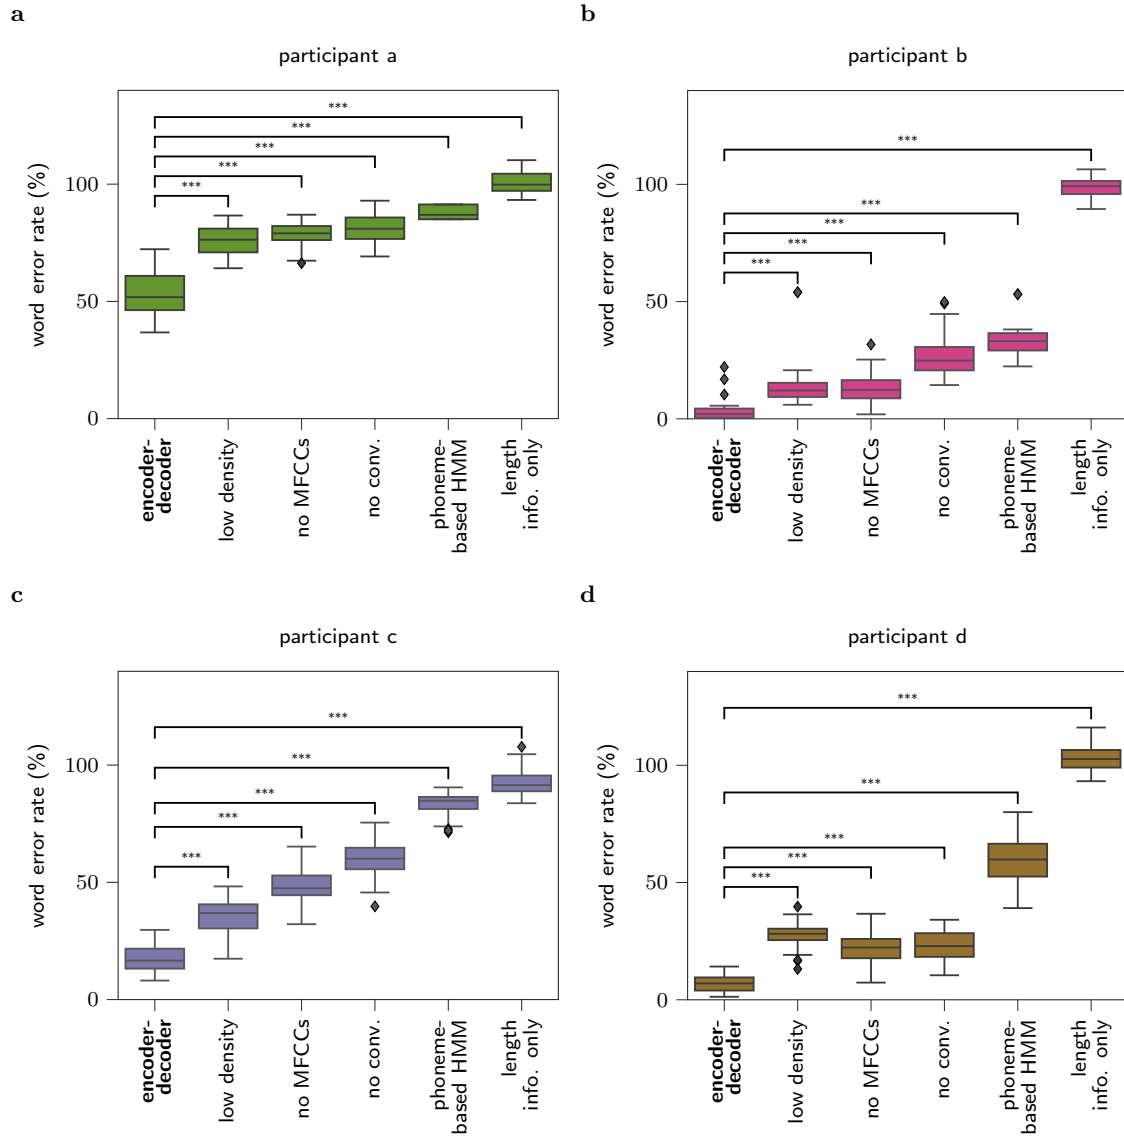

**Supplementary Figure 1: Word error rates (WERs) under the encoder-decoder and various competitor decoders, for all four participants.** This figure reprises Figure 2a for all four participants (participant **b** is repeated here). Each subfigure (i.e., participant) shows the distribution of WERs under the encoder-decoder (first bar), four crippled variants thereof (bars 2-4 and 6), and a state-of-the-art sentence classifier based on ECoG-to-phoneme Viterbi decoding (“phoneme-based HMM”). Abbreviations: “no MFCCs”: trained without requiring the encoder to predict MFCCs; “low density”: trained and tested on simulated lower-density grid (8-mm rather than 4-mm spacing); “no conv.”: the network’s temporal convolution layer is replaced with a fully connected layer; “length info. only”: the input ECoG sequences are replaced with Gaussian noise—but of the correct length. The box and whiskers show, respectively, the quartiles and the extent (excepting outliers which are shown explicitly as black diamonds) of the distribution of WERs across  $n = 30$  networks trained from scratch and evaluated on randomly selected held-out blocks. Significance for each subject, indicated by stars (\*\*\*:  $p < 0.0005$ ), was computed with a one-sided Wilcoxon signed-rank test, and Holm-Bonferroni corrected for five comparisons. Exact p values appear in Table 5.

| pic. # | sentence                                                                                                                                                                                                                                                                                                                                                                                                                                                              |
|--------|-----------------------------------------------------------------------------------------------------------------------------------------------------------------------------------------------------------------------------------------------------------------------------------------------------------------------------------------------------------------------------------------------------------------------------------------------------------------------|
| 1      | part of the cake was eaten by the dog<br>several adults and kids are in the room<br>the little boy is crying because the dog ate his cake<br>the mother is angry at her pet dog<br>under the sofa is a hiding dog<br>the woman is holding a broom<br>there is a partially eaten cake on the large table<br>four candles are lit on the cake<br>the guests arrived with presents<br>the child is turning four years old                                                |
| 2      | while falling the boy grabs a cookie<br>the boy is reaching for the cookie jar<br>there is chaos in the kitchen<br>water is overflowing from the sink<br>if only the mother could pay attention to her children<br>the stool is tipping over<br>the little girl is giggling<br>his sister is helping him steal a cookie<br>bushes are outside the window<br>i think their water bill will be high                                                                     |
| 3      | the firemen are coming to the rescue<br>the girl was riding a tricycle<br>which ladder will be used to rescue the cat and the man<br>the cat does not want to come off the tree branch<br>in the tree there is a cat a man and a bird<br>a dog is barking at the man in the tree<br>a little bird is watching the commotion<br>worried by the dog the man considers jumping<br>the cat doesnt seem interested in coming down<br>how did the man get stuck in the tree |

**Supplementary Table 1:** The picture descriptions read by participants **c** and **d**. N.B. that patients did not view the pictures, but the subsets associated with each picture (pic. #) were sometimes presented in separate blocks.

| participant: |          |        | a    |      | b    |      | c    | d    |      |      |
|--------------|----------|--------|------|------|------|------|------|------|------|------|
| data set:    |          |        | MT-1 | MT-* | MT-1 | MT-* | PD   | MT-1 | MT-* | PD   |
| training     | sentence | types  | 50   | 460  | 50   | 460  | 30   | 50   | 460  | 30   |
|              |          | tokens | 100  | 924  | 450  | 860  | 559  | 100  | 909  | 740  |
|              | word     | types  | 239  | 1787 | 240  | 1787 | 122  | 238  | 1745 | 123  |
|              |          | tokens | 610  | 6897 | 2740 | 5890 | 5453 | 607  | 6729 | 7292 |
| validation   | sentence | types  | 50   | 50   | 50   | 50   | 30   | 50   | 50   | 30   |
|              |          | tokens | 50   | 50   | 50   | 50   | 60   | 50   | 50   | 82   |
|              | word     | types  | 238  | 238  | 239  | 239  | 122  | 230  | 230  | 122  |
|              |          | tokens | 304  | 304  | 303  | 303  | 592  | 302  | 302  | 809  |

**Supplementary Table 2:** Data sets for training and testing, broken down by participant. MT-1 = MOCHA-TIMIT, first set of 50 sentences; MT-\* = MOCHA-TIMIT, full set of 460 sentences for training, first set of 50 for testing; PD = picture descriptions. The numbers of tokens are given for a (typical) fold of cross validation but in practice could vary slightly because the cross-validation procedure partitioned the data by blocks rather than sentences. The numbers of sentence types are nominal, i.e. were not increased to reflect (rare) participant misreadings.

| layer type         | # units                    | connectivity                     | nonlinearity |
|--------------------|----------------------------|----------------------------------|--------------|
| encoder embedding  | [100]                      | temporal conv. (width=stride=12) | none         |
| encoder RNN        | $[400, 400, 400] \times 2$ | bidirectional                    | LSTM         |
| encoder projection | [225, 13]                  | full                             | [ReLU, none] |
| decoder embedding  | [150]                      | full                             | ReLU         |
| decoder RNN        | [800]                      | unidirectional                   | LSTM         |
| decoder projection | [1806] or [125]            | full                             | softmax      |

**Supplementary Table 3:** Architecture hyperparameters.

| parameter                      | value  |
|--------------------------------|--------|
| learning rate                  | 0.0005 |
| feed-forward dropout           | 0.1    |
| RNN dropout                    | 0.5    |
| MFCC-penalty weight, $\lambda$ | 0.1    |
| examples/mini-batch            | 256    |
| EMA decay, $\eta$              | 0.99   |
| # training epochs              | 800    |
| TL: # pre-training epochs      | 200    |
| TL: # training epochs          | 60     |
| TL: # post-training epochs     | 540    |

**Supplementary Table 4:** Training hyperparameters. RNN = recurrent neural network, MFCC = Mel-frequency cepstral coefficients, EMA = exponential moving average (see Methods); TL = transfer learning.

| participant | baseline model: | low density | no MFCCs | no conv. | phoneme-based HMM | length info. only |
|-------------|-----------------|-------------|----------|----------|-------------------|-------------------|
| <b>a</b>    | p value         | 8.7e-07     | 9.6e-07  | 8.7e-07  | 8.7e-07           | 8.7e-07           |
|             | test statistic  | 465         | 464      | 465      | 465               | 465               |
|             | effect size     | 1.00        | 1.00     | 1.00     | 1.00              | 1.00              |
| <b>b</b>    | p value         | 8.7e-07     | 9.6e-07  | 8.7e-07  | 8.6e-07           | 8.7e-07           |
|             | test statistic  | 465         | 464      | 465      | 465               | 465               |
|             | effect size     | 1.00        | 1.00     | 1.00     | 1.00              | 1.00              |
| <b>c</b>    | p value         | 8.7e-07     | 8.7e-07  | 8.7e-07  | 8.7e-07           | 8.7e-07           |
|             | test statistic  | 465         | 465      | 465      | 465               | 465               |
|             | effect size     | 1.00        | 1.00     | 1.00     | 1.00              | 1.00              |
| <b>d</b>    | p value         | 8.7e-07     | 8.7e-07  | 8.7e-07  | 8.7e-07           | 8.7e-07           |
|             | test statistic  | 465         | 465      | 465      | 465               | 465               |
|             | effect size     | 1.00        | 1.00     | 1.00     | 1.00              | 1.00              |

**Supplementary Table 5:** Complete statistics for the comparison of the encoder-decoder to various “baseline” models, shown in Figure 2a (participant **b**) and Supplementary Figure 1 (all participants). All comparisons were made across  $n = 30$  independently trained models with a one-sided Wilcoxon signed-rank test. The reported test statistic is therefore the sum of positive signed ranks, and the effect size is the rank correlation. Before determining statistical significance, the p values reported here were Holm-Bonferroni corrected within each subject for five comparisons.

| competitor (row) vs. baseline (col) |                | a/MT-1               | b→a/MT-1             |
|-------------------------------------|----------------|----------------------|----------------------|
| b→a/MT-1                            | p value        | $9.9 \times 10^{-6}$ | –                    |
|                                     | test statistic | 440                  | –                    |
|                                     | effect size    | 0.89                 | –                    |
| a/MT-*                              | p value        | $8.7 \times 10^{-7}$ | –                    |
|                                     | test statistic | 465                  | –                    |
|                                     | effect size    | 1.0                  | –                    |
| b→a/MT-*                            | p value        | $1.1 \times 10^{-6}$ | $3.6 \times 10^{-2}$ |
|                                     | test statistic | 463                  | 320                  |
|                                     | effect size    | 0.99                 | 0.38                 |
|                                     |                | b/MT-1               | a→b/MT-1             |
| a→b/MT-1                            | p value        | $1.3 \times 10^{-3}$ | –                    |
|                                     | test statistic | 409                  | –                    |
|                                     | effect size    | 0.76                 | –                    |
| b/MT-*                              | p value        | $1.9 \times 10^{-3}$ | –                    |
|                                     | test statistic | 373                  | –                    |
|                                     | effect size    | 0.60                 | –                    |
| a→b/MT-*                            | p value        | $1.3 \times 10^{-6}$ | $1.9 \times 10^{-4}$ |
|                                     | test statistic | 461                  | 405                  |
|                                     | effect size    | 0.98                 | 0.74                 |
|                                     |                | d/MT-1               | b→d/MT-1             |
| b→d/MT-1                            | p value        | $2.0 \times 10^{-5}$ | –                    |
|                                     | test statistic | 432                  | –                    |
|                                     | effect size    | 0.86                 | –                    |
| d/MT-*                              | p value        | 1.0                  | –                    |
|                                     | test statistic | 45                   | –                    |
|                                     | effect size    | -0.81                | –                    |
| b→d/MT-*                            | p value        | 0.99                 | $1.8 \times 10^{-2}$ |
|                                     | test statistic | 122                  | 335                  |
|                                     | effect size    | -0.48                | 0.44                 |
|                                     |                | c/PD                 | d→c/PD               |
| d→c/PD                              | p value        | 1.0                  | –                    |
|                                     | test statistic | 39.0                 | –                    |
|                                     | effect size    | -0.83                | –                    |
|                                     |                | d/PD                 | c→d/PD               |
| c→d/PD                              | p value        | 0.28                 | –                    |
|                                     | test statistic | 244                  | –                    |
|                                     | effect size    | 0.12                 | –                    |

**Supplementary Table 6:** Complete statistics for the transfer-learning hypothesis tests reported in the main text. MT-1 = MOCHA-TIMIT, first set of 50 sentences; MT-\* = MOCHA-TIMIT, full set of 460 sentences for training, first set of 50 for testing; PD = picture descriptions. All comparisons were made across  $n = 30$  independently trained models with a one-sided Wilcoxon signed-rank test. The reported test statistic is therefore the sum of positive signed ranks, and the effect size is the rank correlation. Lowercase letters identify participants; so, e.g., **b→a** indicates training and testing on participant **a**, with pre-training on participant **b**. Before determining statistical significance, the p values reported here were Holm-Bonferroni corrected for the fourteen comparisons shown in the table.
